# Supplementary material for: Overexpression of β-Ketoacyl CoA Synthase 2B.1 from Chenopodium quinoa Promotes Suberin Monomers’ Production and Salt Tolerance in Arabidopsis thaliana
Source: MDPI journal article supplement (doi:10.3390/ijms232113204), 2022-10-30
Supplement: s1 [file s1]

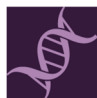

Article

# Overexpression of $\beta$ -Ketoacyl CoA Synthase 2B.1 from *Chenopodium quinoa* promotes suberin monomers production and salt tolerance in *Arabidopsis thaliana*

Faheem Tariq<sup>1,†</sup>, Shuangshuang Zhao<sup>1,†</sup>, Naveed Ahmad<sup>2</sup>, Pingping Wang<sup>1</sup>, Qun Shao<sup>1</sup>, Changle Ma<sup>1\*</sup> and Xianpeng Yang<sup>1\*</sup>

<sup>1</sup> Shandong Provincial Key Laboratory of Plant Stress, College of Life Sciences, Shandong Normal University, Jinan 250014, China

<sup>2</sup> Institute of Crop and Germplasm Resource (Institute of Biotechnology), Shandong Academy of Agricultural Sciences, Jinan 250100, China

\* Correspondence: machangle@sdnu.edu.cn; yangxp2006@sdnu.edu.cn

† These authors contributed equally to this work.

**Citation:** Tariq, F.; Zhao, S.; Ahmad, N.; Wang, P.; Shao, Q.; Ma, C.; Yang, X. Overexpression of  $\beta$ -Ketoacyl CoA Synthase 2B.1 from *Chenopodium quinoa* promotes suberin monomers production and salt tolerance in *Arabidopsis*. *Int. J. Mol. Sci.* **2022**, *23*, 13204. <https://doi.org/10.3390/ijms232113204>

Academic Editors: Shaojun Dai and Chunzhao Zhao

Received: 10 September 2022

Accepted: 26 October 2022

Published: 30 October 2022

**Publisher's Note:** MDPI stays neutral with regard to jurisdictional claims in published maps and institutional affiliations.

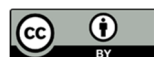

**Copyright:** © 2022 by the authors. Licensee MDPI, Basel, Switzerland. This article is an open access article distributed under the terms and conditions of the Creative Commons Attribution (CC BY) license (<https://creativecommons.org/licenses/by/4.0/>).

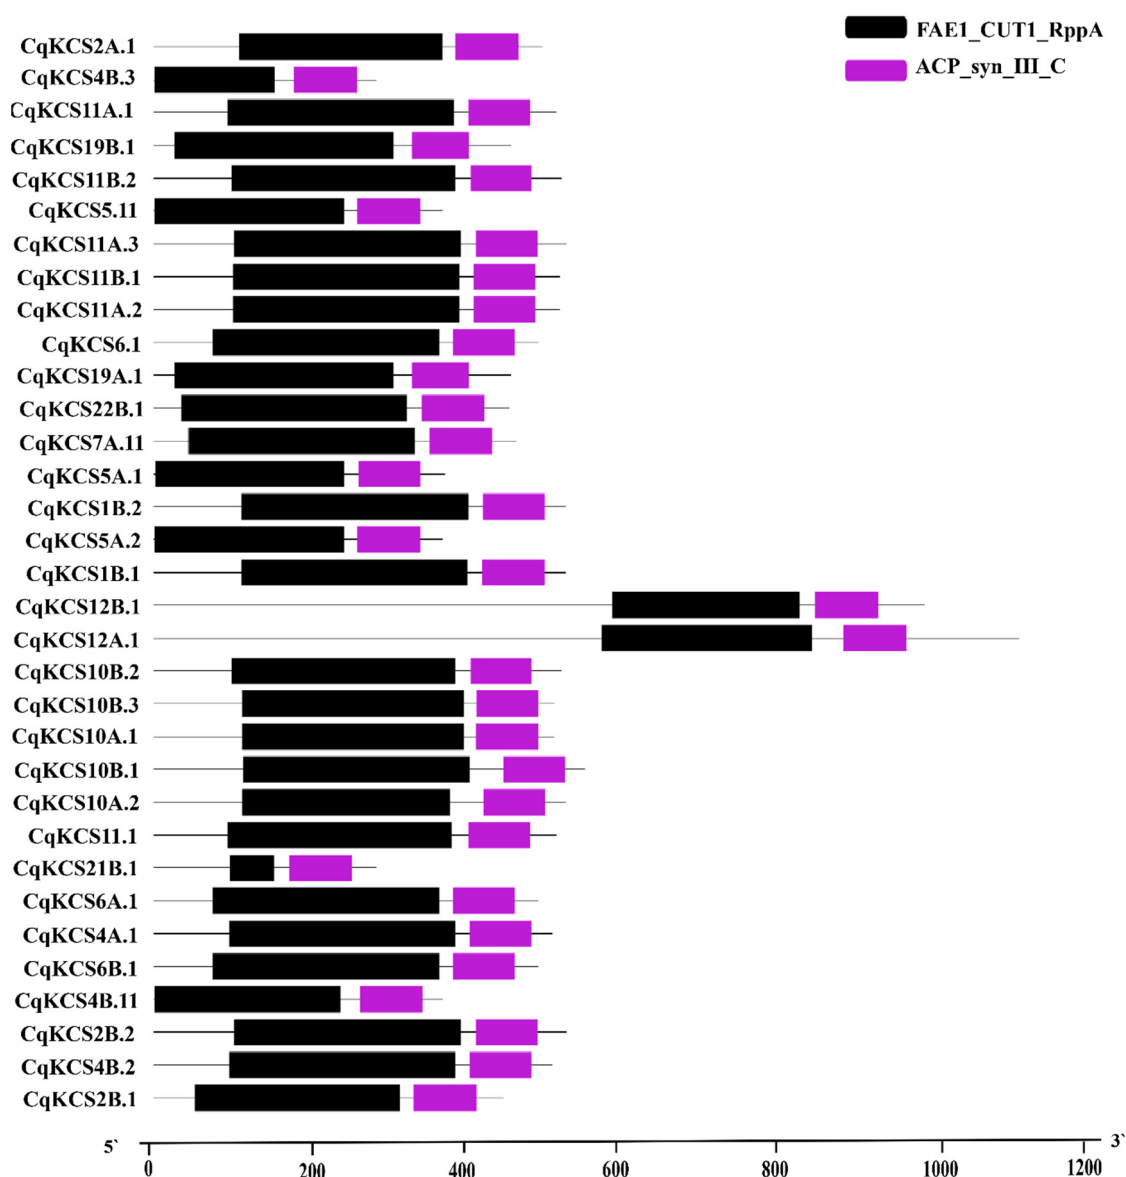

**Supplementary Figure S1.** The conserved domain of CqKCS from quinoa. The 33 CqKCS protein sequence contains two conserved domains i.e., FAE\_CUT1\_RppA (PF08392) and ACP\_syn\_III\_C (PF08541).

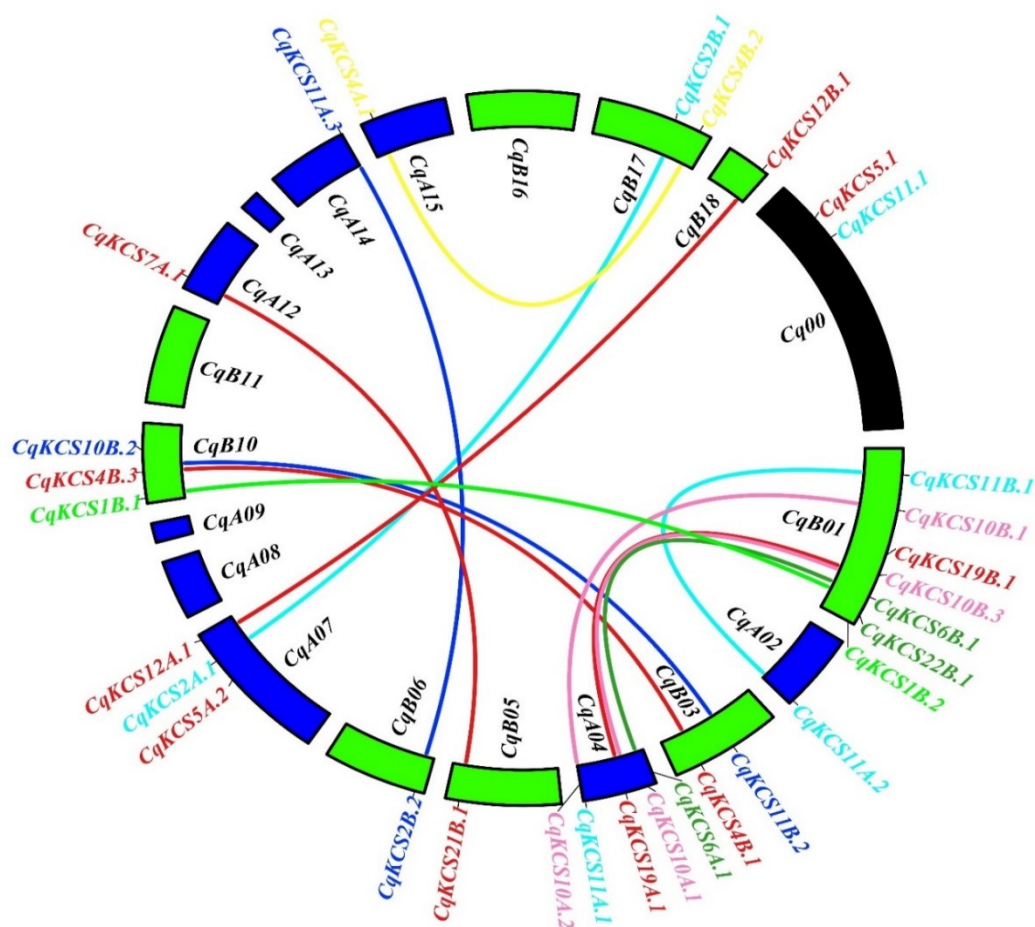

**Supplementary Figure S2.** Circos diagram of the CqKCS duplicated gene pairs in quinoa. The chromosome number is displayed inside the track, and the subgenome is indicated by the letters A and B, followed by the chromosome number. The joining lines represent CqKCS gene pairs that have been replicated between the A and B sub-genome. Outside of the chromosome, a gene's name is represented. The non-joined lines of KCS genes are not duplicated or non-syntenic.

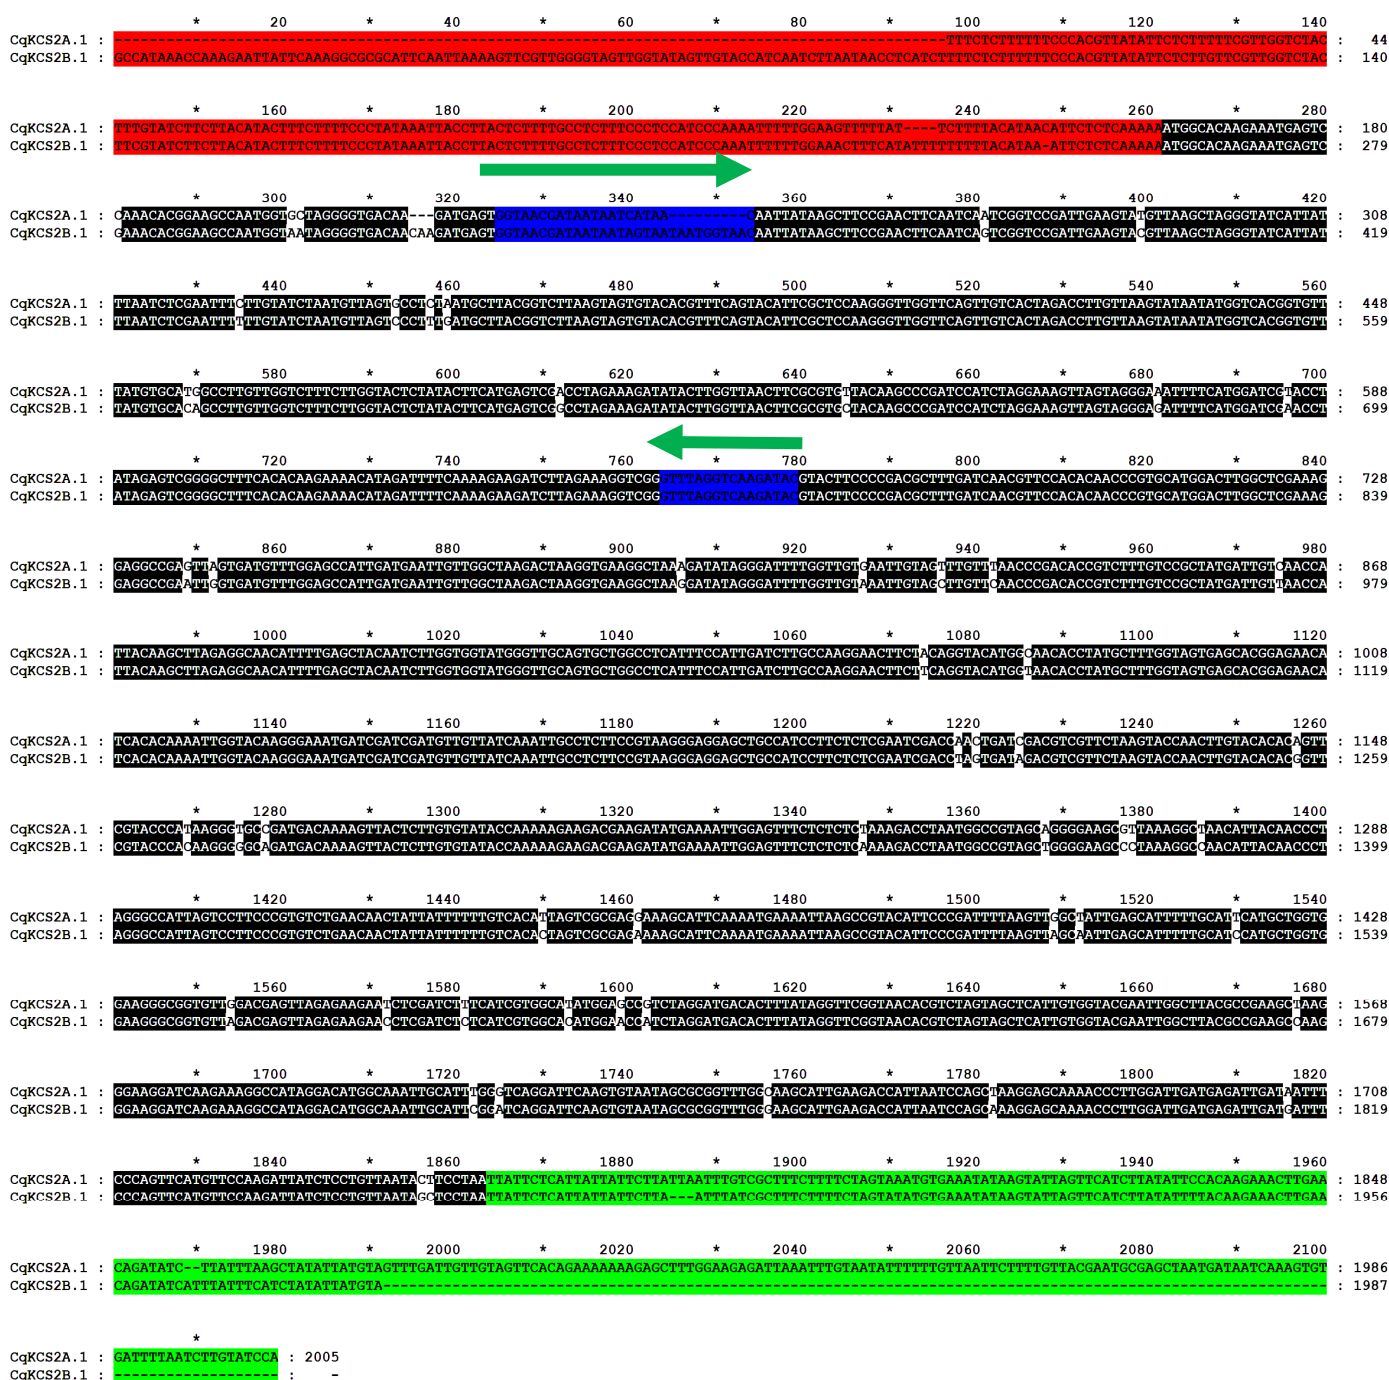

**Supplementary Figure S3.** The aligned sequence of CqKCS2A.1 and CqKCS2B.1 containing Semi RT-qPCR primers. Red color indicates 5' UTR, the green color indicates 3' UTR, the blue color indicates the primer attachment sequence. However, the forward primers used were different for CqKCS2A.1 as shown in supplementary material. Whereas, the reverse primer used was the same.

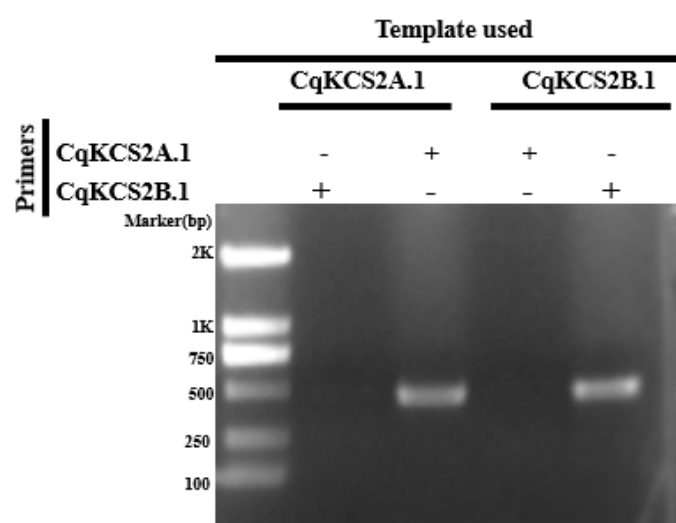

Supplementary Figure S4. CqKCS2A.1 and CqKCS2B.1 primer specificity in quinoa for semi-RT-qPCR.

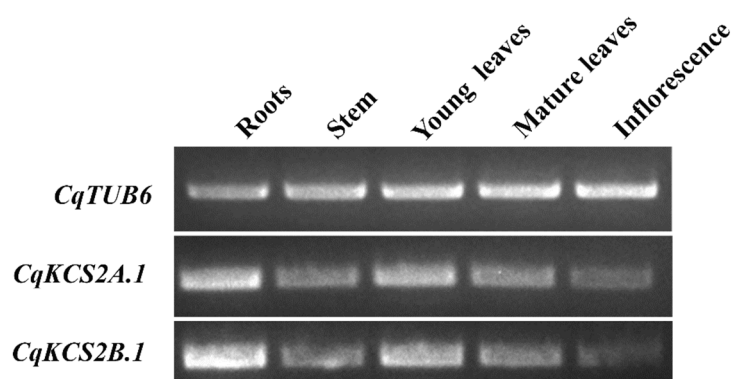

Supplementary Figure S5. The CqKCS2A.1 and CqKCS2B.1 expression analysis among different tissues of *C. quinoa*.

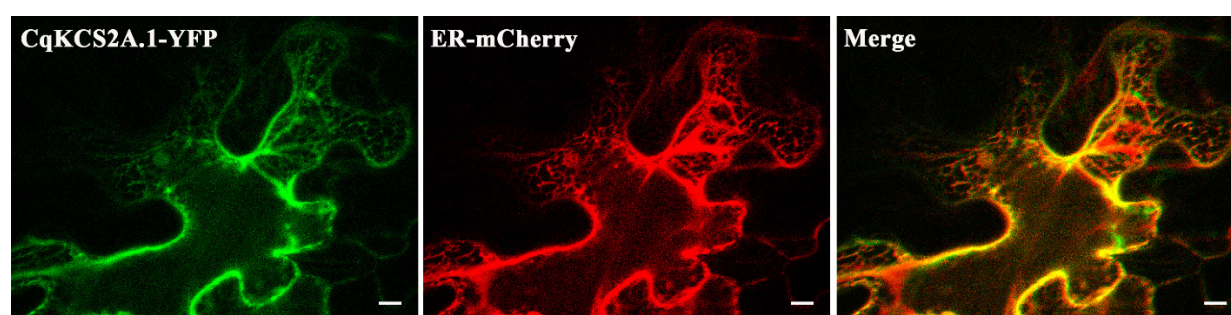

Supplementary Figure S6. *CqKCS2A.1* is localized to the Endoplasmic reticulum. Bar = 10  $\mu$ m

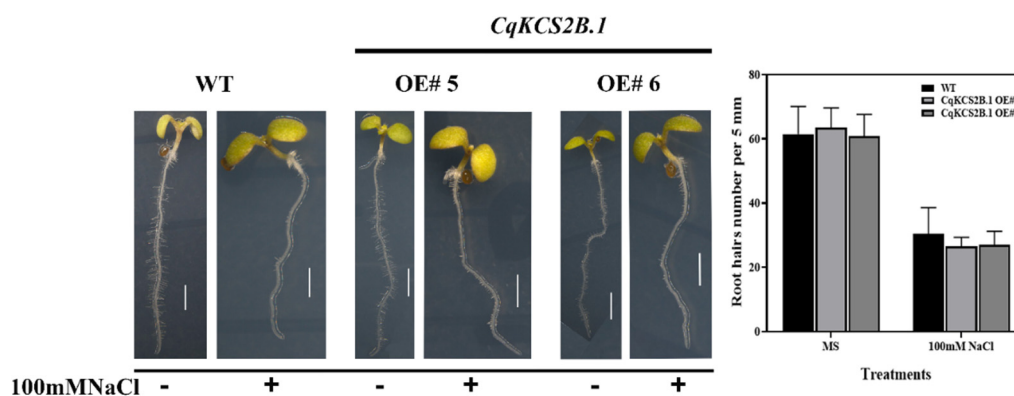

**Supplementary Figure S7. Roots hair length and density of CqKCS2B.1 increases under salt stress.** The statistical data significance was evaluated by ANOVA. Scale = 2mm.

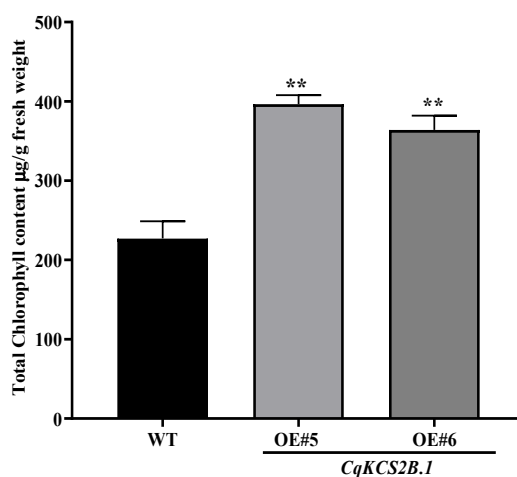

**Supplementary Figure S8. Total chlorophyll analysis of CqKCS2B.1 transgenic lines transgenic.** The statistical data significance was evaluated by ANOVA. Different \* indicates the significant difference between different transgenic and WT at  $P < 0.05$ . However, \*\* indicates  $p < 0.01$ . scale=1cm.

| S. No | Gene ID        | Gene Name  | Chromosome Name | Gene Start (bp) | Gene End (bp) | Gene Orientation | Protein Length (AA) | PI   | Molecular weight (KDa) | Instability index | GRAVY  |
|-------|----------------|------------|-----------------|-----------------|---------------|------------------|---------------------|------|------------------------|-------------------|--------|
| 1     | AUR62020751-RA | CqKCS10A.1 | CqA04           | 18503386        | 18505576      | F                | 511                 | 8.95 | 57749.39               | 40.36             | -0.17  |
| 2     | AUR62033438-RA | CqKCS11B.1 | CqB01           | 20017552        | 20019108      | F                | 518                 | 9.1  | 58113.63               | 42.33             | -0.07  |
| 3     | AUR62035979-RA | CqKCS19A.1 | CqA04           | 22661716        | 22663083      | F                | 455                 | 8.57 | 52114.46               | 32.8              | -0.15  |
| 4     | AUR62024778-RA | CqKCS10B.1 | CqB01           | 46501790        | 46498730      | R                | 550                 | 9.15 | 61975                  | 43.59             | -0.19  |
| 5     | AUR62035224-RA | CqKCS5A.14 | CqA14           | 7608832         | 7609947       | R                | 371                 | 8.89 | 41035.74               | 43.09             | -0.05  |
| 6     | AUR62034881-RA | CqKCS4B.1  | CqB03           | 62068585        | 62069691      | R                | 368                 | 8.55 | 40479.47               | 34.64             | -0.08  |
| 7     | AUR62005216-RA | CqKCS21B.1 | CqB05           | 72276953        | 72277969      | F                | 284                 | 9.14 | 32798.85               | 33.24             | -0.205 |
| 8     | AUR62016077-RA | CqKCS5A.2  | CqA07           | 77110018        | 77108912      | F                | 368                 | 9.39 | 41113.12               | 43.67             | -0.04  |
| 9     | AUR62041842-RA | CqKCS11.1  | Chr00           | 49761046        | 49759505      | R                | 513                 | 8.86 | 58046.41               | 42.64             | -0.08  |
| 10    | AUR62006329-RA | CqKCS2A.1  | CqA07           | 89453807        | 89456293      | R                | 496                 | 9.31 | 56167.08               | 37.81             | -0.19  |
| 11    | AUR62041628-RA | CqKCS19B.1 | CqB01           | 100574769       | 100576136     | F                | 455                 | 8.57 | 52109.44               | 34.25             | -0.15  |
| 12    | AUR62044250-RA | CqKCS6.1   | Chr00           | 133275289       | 133277859     | F                | 491                 | 9.19 | 55558.22               | 37.32             | -0.01  |
| 13    | AUR62042172-RA | CqKCS11B.2 | CqB03           | 35705846        | 35710413      | R                | 520                 | 9.36 | 58357.16               | 29.63             | -0.03  |
| 14    | AUR62000752-RA | CqKCS7A.1  | CqA12           | 8670912         | 8672537       | R                | 463                 | 9.3  | 52064.73               | 32.96             | 0.038  |
| 15    | AUR62016745-RA | CqKCS4B.2  | CqB17           | 74376826        | 74378352      | F                | 508                 | 9.34 | 57278.72               | 33.93             | -0.01  |
| 16    | AUR62032347-RA | CqKCS11A.1 | CqA04           | 51753194        | 51754735      | R                | 513                 | 8.86 | 57915.26               | 40.19             | -0.06  |
| 17    | AUR62032441-RA | CqKCS10A.2 | CqA04           | 53017692        | 53020633      | F                | 525                 | 9.12 | 58950.43               | 43.23             | -0.2   |
| 18    | AUR62026627-RA | CqKCS4B.3  | CqB10           | 23561607        | 23562461      | R                | 284                 | 9.11 | 31568.16               | 33.28             | -0.185 |
| 19    | AUR62026367-RA | CqKCS2B.1  | CqB17           | 58497811        | 58500217      | R                | 446                 | 9.18 | 50287.45               | 37.66             | -0.08  |

|    |                    |                |       |               |               |   |      |      |           |       |        |
|----|--------------------|----------------|-------|---------------|---------------|---|------|------|-----------|-------|--------|
| 20 | AUR6201131<br>1-RA | CqKCS4A.1      | CqA15 | 9345789       | 9347315       | R | 508  | 9.43 | 57359.81  | 34.47 | -0.04  |
| 21 | AUR6202266<br>4-RA | CqKCS1B.1      | CqB10 | 5432330       | 5433907       | F | 525  | 9.19 | 59128.71  | 30.47 | -0.09  |
| 22 | AUR6201106<br>1-RA | CqKCS11A.<br>2 | CqA02 | 5618308<br>2  | 5618463<br>8  | F | 518  | 9.02 | 58051.53  | 42.7  | -0.06  |
| 23 | AUR6200185<br>1-RA | CqKCS12A.<br>1 | CqA07 | 1051719<br>87 | 1051853<br>27 | F | 1105 | 8.61 | 126012.01 | 46.77 | -0.368 |
| 24 | AUR6200898<br>4-RA | CqKCS6A.1      | CqA04 | 6081797       | 6084367       | F | 491  | 9.19 | 55558.22  | 37.32 | -0.01  |
| 25 | AUR6202331<br>9-RA | CqKCS6B.1      | CqB01 | 1144851<br>08 | 1144875<br>64 | R | 491  | 9.27 | 55525.22  | 36.28 | -0.01  |
| 26 | AUR6202331<br>4-RA | CqKCS22B.<br>1 | CqB01 | 1145151<br>91 | 1145165<br>55 | F | 454  | 9.36 | 51266.04  | 45.91 | -0.04  |
| 27 | AUR6202128<br>6-RA | CqKCS5.1       | Chr00 | 3655763<br>1  | 3655873<br>7  | F | 368  | 9.46 | 40713.69  | 40.02 | -0.035 |
| 28 | AUR6200455<br>1-RA | CqKCS1B.2      | CqB01 | 1202354<br>50 | 1202370<br>27 | F | 525  | 9.19 | 59280.95  | 31.02 | -0.09  |
| 29 | AUR6200589<br>7-RA | CqKCS11A.<br>3 | CqA14 | 5900965<br>2  | 5901267<br>4  | F | 527  | 9.09 | 59581.46  | 35.59 | -0.08  |
| 30 | AUR6202241<br>6-RA | CqKCS10B.<br>2 | CqB10 | 2880196<br>4  | 2880683<br>5  | R | 520  | 9.18 | 58156.88  | 29.91 | -0     |
| 31 | AUR6200964<br>4-RA | CqKCS12B.<br>1 | CqB18 | 2806779<br>0  | 2807407<br>4  | F | 984  | 8.45 | 111885.4  | 45.64 | -0.363 |
| 32 | AUR6202796<br>2-RA | CqKCS10B.<br>3 | CqB01 | 1035277<br>13 | 1035298<br>57 | R | 511  | 8.94 | 57693.65  | 38.97 | -0.13  |
| 33 | AUR6203288<br>5-RA | CqKCS2B.2      | CqB06 | 6748608       | 6751744       | F | 527  | 9.13 | 59614.66  | 32.1  | -0.05  |

**Supplementary Table S1.** Physiochemical properties of CqKCS proteins. Protein identification of all CqKCS from *C. quinoa* with their corresponding chemical and physical characteristics including gene id, protein length, molecular weight (MW; Da), isoelectric points, instability index and GRAVY. EPASY tool was used to collect the data <http://web.expasy.org/protparam/>.



| Vector construction primers           |                                                    |
|---------------------------------------|----------------------------------------------------|
| CqKCS2B.1-YFPF                        | ACATTTACAATTACGGATCCATGGCACAAGAAATGAGTCGAAACACGG   |
| CqKCS2B.1-YFPR                        | TCGCCCTTGCCCATGGATCCGGAGCTATTAACAGGAGATAATCTTGGAAC |
| CqKCS2A.1-YFPF                        | ACATTTACAATTACGGATCCATGGCACAAGAAATGAGTC            |
| CqKCS2A.1-YFPR                        | TCGCCCTTGCCCATGGATCCTTAGGAAGTATTAACAGGAGAT         |
| qRT-PCR                               |                                                    |
| CqTub6. FP                            | G TTCAGGAGAGTAAGCGAGCAGTTC                         |
| CqTub6. RP                            | CTCTTCCTCATCGGCGGTAGCA                             |
| CqCMO. FP                             | TCCAAAGCAAGCGAAGAACAGTCA                           |
| CqCMO. RP                             | TTCAGCACAACCTACCAAGCCATTCA                         |
| CqKCS2. FP                            | ACCGTCTTTGTCCGCTATGATTGTT                          |
| CqKCS2. RP                            | TGATGTTCTCCGTGCTCACTACC                            |
| Semi RT PCR                           |                                                    |
| CqKCS2B.1 RT-F                        | GGTAACGATAATAATAGTAATAATGG                         |
| CqKCS2B.1 RT-R                        | GTACGTATCTTGACCTAAAC                               |
| CqKCS2A.1 RT-F                        | GTGGTAACGATAATAATCATAAC                            |
| CqKCS2A.1 RT-R                        | GTACGTATCTTGACCTAAAC                               |
| CqTUB6 FP                             | TGAGAACGCAGATGAGTGTATG                             |
| CqTUB6 RP                             | GAAACGAAGACAGCAAGTGACA                             |
| CqCMO FP                              | TTGTTGCTAGAGTTGAGCGT                               |
| CqCMO RP                              | AGGGGTGCAATGGTGTATTAT                              |
| Lateral root associated genes Primers |                                                    |
| PUCHI qRT FP                          | ACGGCTCGTTATCTTCTTCACT                             |
| PUCHI qRT RP                          | TGGACTTATTATGTTCTTCGCTTG                           |
| GH3.3-qRT FP                          | ACAATTCCGCTCCACAGTTC                               |
| GH3.3-qRT RP                          | ACGAGTTCCTTGCTCTCCAA                               |
| GH3.5qRT FP                           | GTCTTCGAGGACTGCTGCTT                               |
| GH3.5-qRT RP                          | ATGTCCCTGGCTCAACAATC                               |
| AUX1 qRT FP                           | GAGGTCACGCGGTTACTGTT                               |
| AUX1 qRT RP                           | ATAAGAGAGAAAGCGTTGGAGTGG                           |
| LBD29-qRT FP                          | GCTAGGCTTCAAGATCCCATC                              |
| LBD29-qRT RP                          | TGTGCTGCTTGTTGCTTTAGA                              |
| GATA23-qRT FP                         | TAAGACCACCAAGACACCAATG                             |
| GATA23-qRT RP                         | ACAAAGCAGCTTGTTCTTCCTC                             |
| LBD18-qRT FP                          | TCATCGAAGGTCCGATGCTGTC                             |
| LBD18-qRT RP                          | GCCTGTAGATTACACCTGTTGC                             |
| Actin 2 FP                            | CTTGACCAAGCAGCATGAA                                |
| Actin 2 RP                            | CCGATCCAGACACTGTACTTCCTT                           |
| LBD16 qRT FP                          | TACAACGGCGGGGACAGGT                                |

---

LBD16 qRT RP

GCTGCGAATCTTGCTGCTCC

---

**Supplementary Table S2.** List of Primers used in this study
